# Supplementary material for: Effects of water on the structure and low/high temperature stability of confined proteins
Source: Royal Society of Chemistry journal article supplement (doi:10.1039/c003517c), 2010-01-01

## SUPPLEMENTAL DATA

### S1: Pore size distribution of silica-gel and silica-gel with trehalose

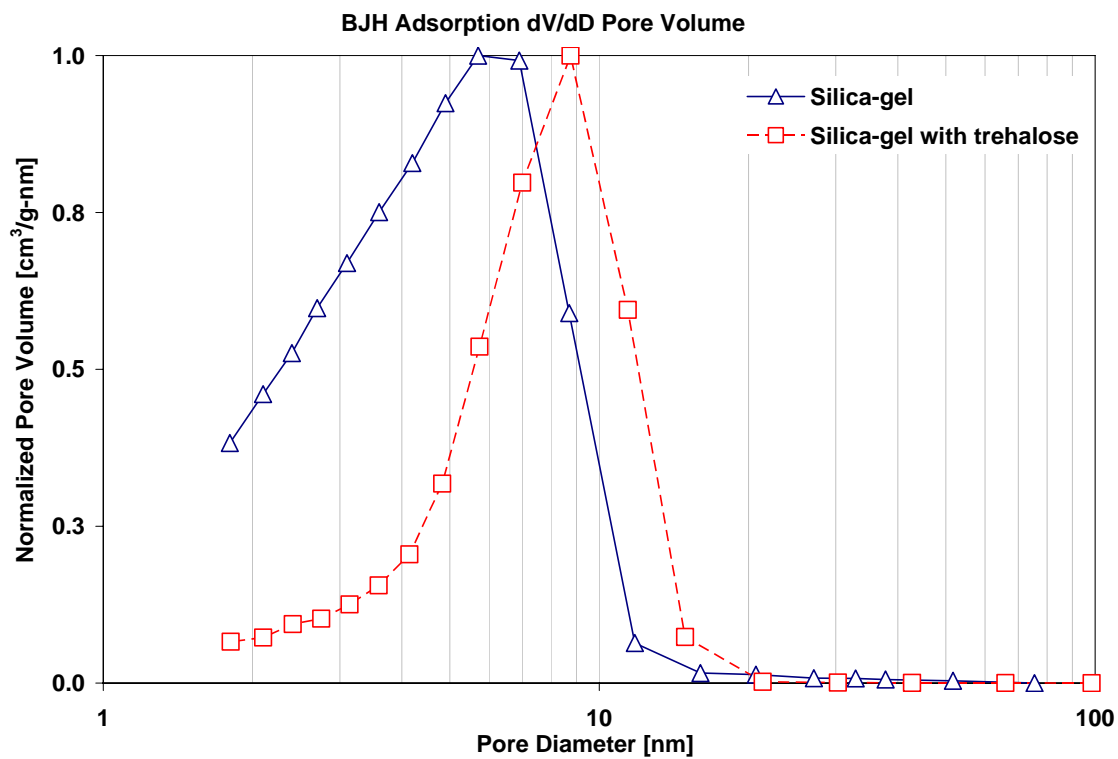

## S2: Correlation of $\Delta\nu$ (change in wavenumber position) with $\alpha$ -helix+ $\beta$ -sheet and $\beta$ -sheet intensity

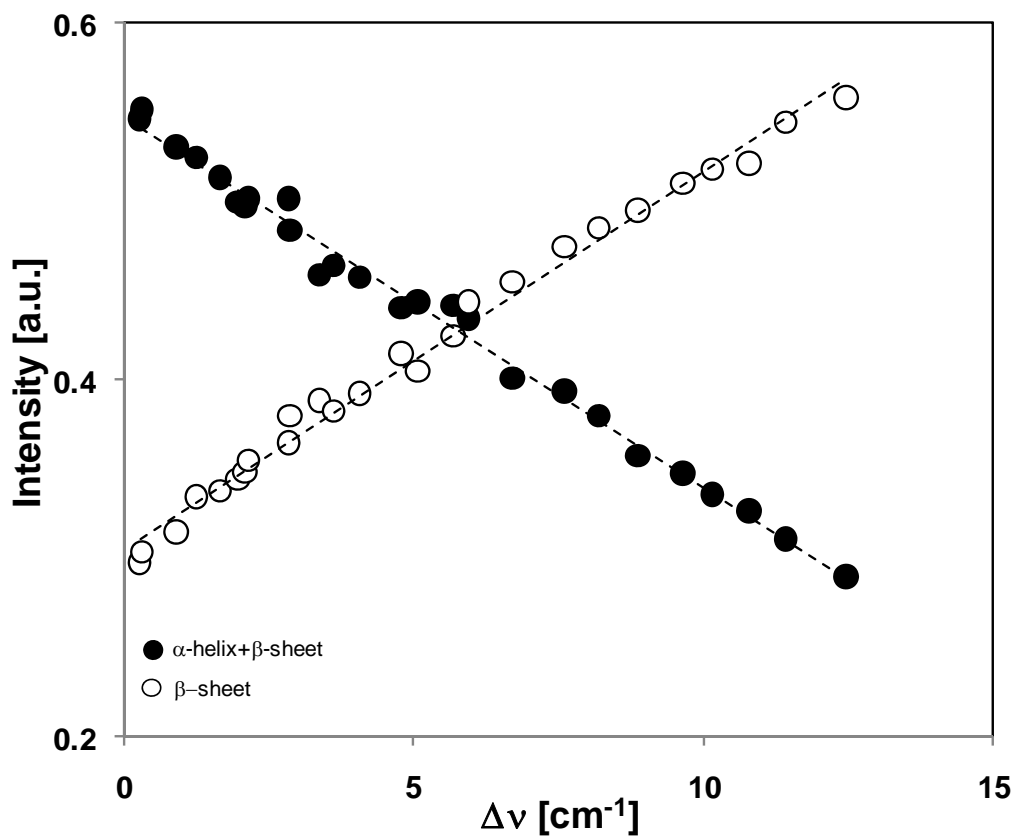

### S3: Decomposition analysis of the $\text{NIR}_{\nu_2+\nu_3}$ band

(A) For bulk water.

(B) For confined water.

(C) For confined water in the presence of Tre (0.25M). The insert correspond to the residual values of the fitting process.

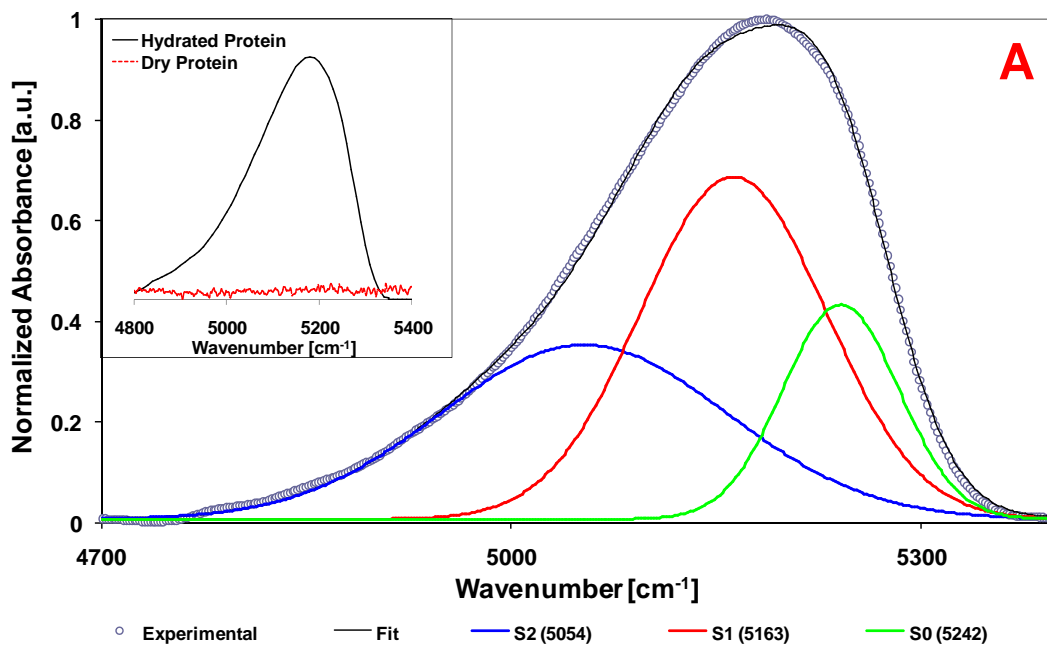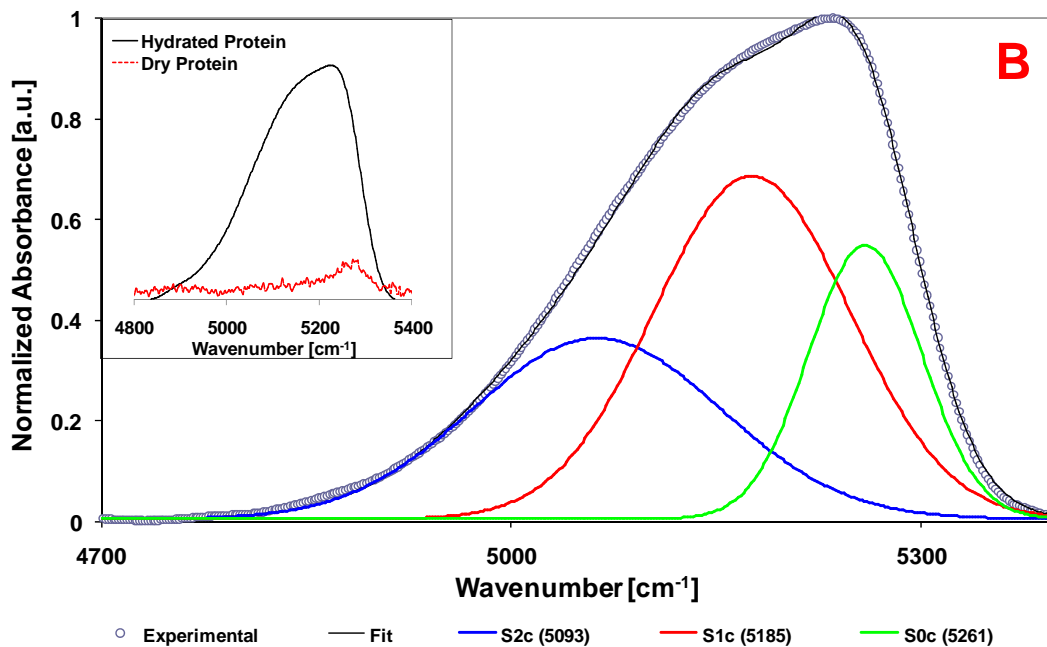

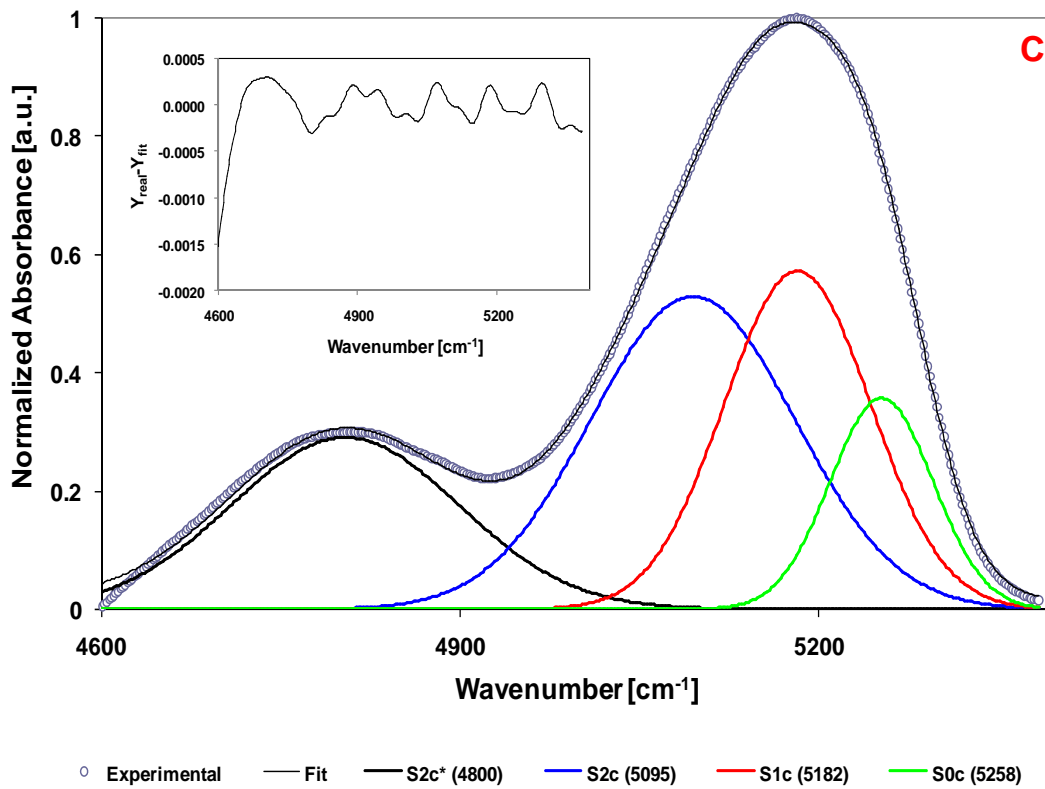

**S4: Temperature-induced changes in the  $S2_c$  water population. The insert shows the temperature-induced in  $S2$ ,  $NW_{\delta-OH}$  and  $NW_{\nu-OH}$  for bulk water.**

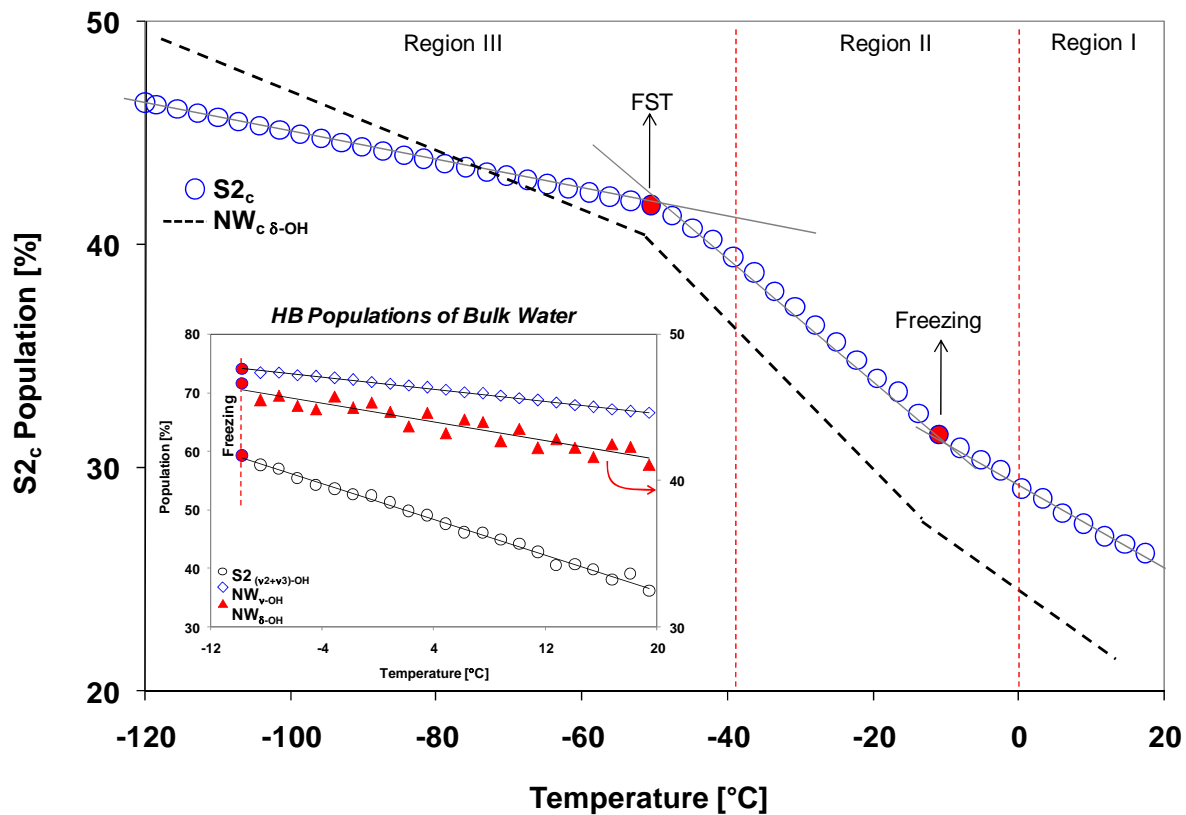

### S5: Protein glass transition ( $T_g$ )

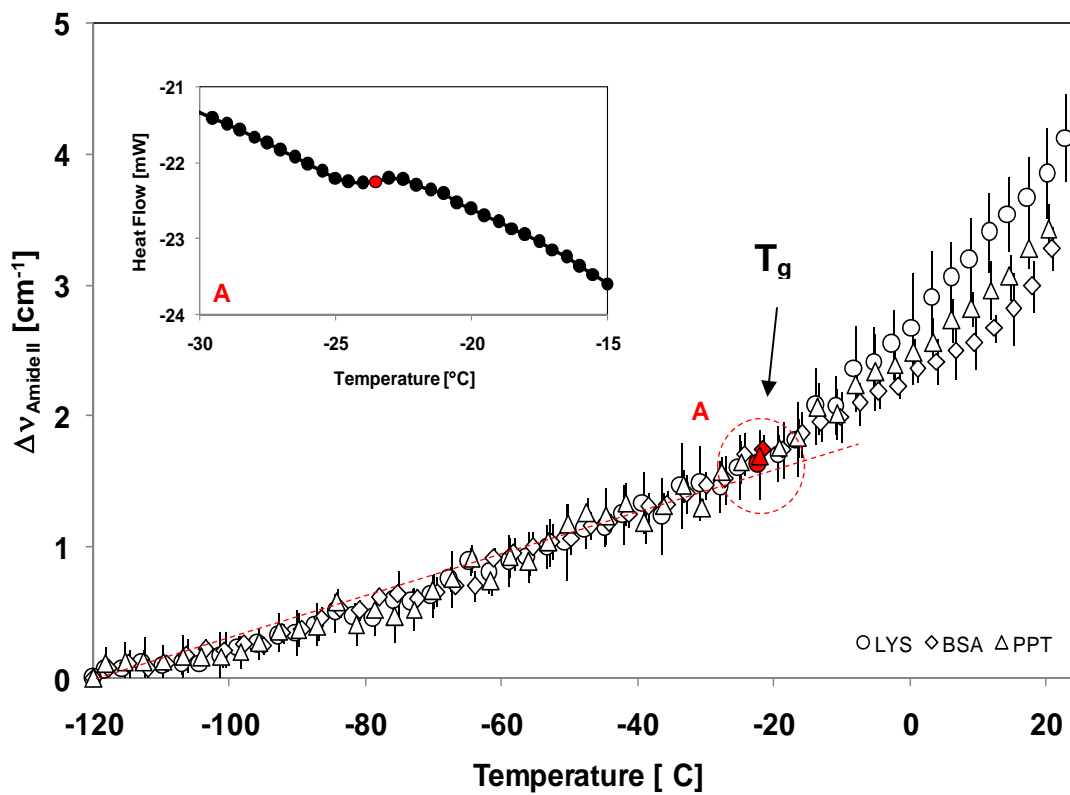

## S6: Solvent accessibility calculation for the model proteins

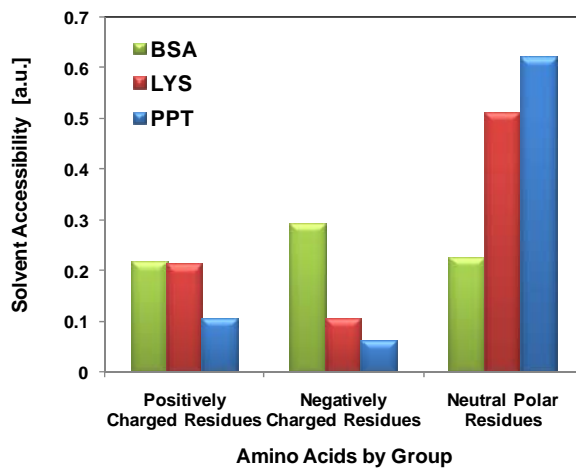

Supplement: c003517c.pdf [file c003517c.pdf]
